# Supplementary material for: Magnetic field assisted fabrication of yolk–shell Co3V2O8microspheres for superior lithium-ion storage
Source: Royal Society of Chemistry journal article supplement (doi:10.1039/d3nj00158j), 2023-01-01
Supplement: d3nj00158j1.pdf [file d3nj00158j1.pdf]

## Supporting Information

### **Magnetic-field assisted fabrication of yolk-shell $\text{Co}_3\text{V}_2\text{O}_8$ microspheres for superior lithium-ion storage**

Jiafeng Zhou,<sup>‡a,b</sup> Jin Bai,<sup>‡a</sup> Yunjie Mao,<sup>a,c</sup> Hongyang Ma,<sup>a,c</sup> Xuebin Zhu,<sup>a</sup> Bangchuan Zhao\*<sup>a</sup> and Yuping Sun<sup>a,d</sup>

<sup>a</sup>Key Laboratory of Materials Physics, Institute of Solid State Physics, HFIPS, Chinese Academy of Sciences, Hefei 230031, People's Republic of China

<sup>b</sup>Faculty of Science, Bengbu University, Bengbu 233030, People's Republic of China

<sup>c</sup>University of Science and Technology of China, Hefei 230026, People's Republic of China

<sup>d</sup>High Magnetic Field Laboratory, Chinese Academy of Sciences, Hefei 230031, People's Republic of China

<sup>‡</sup> These authors contributed equally to this work.

\*Corresponding author: Tel.: +86-0551-65591439-205; E-mail address: bchzhao@issp.ac.cn (Bangchuan Zhao).

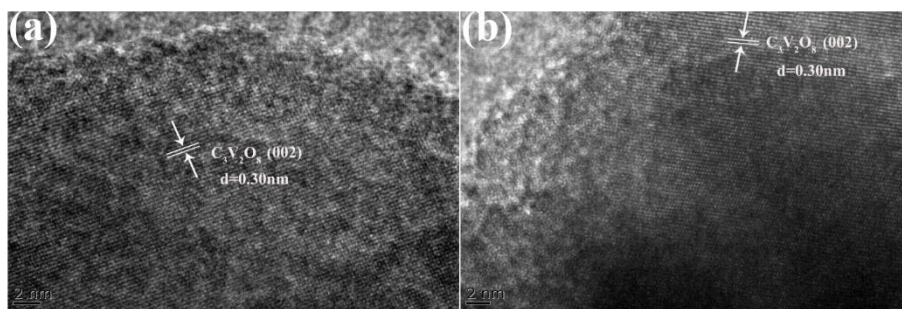

**Fig. S1** HRTEM images of (a) CVO and (b) CVO-1T samples.

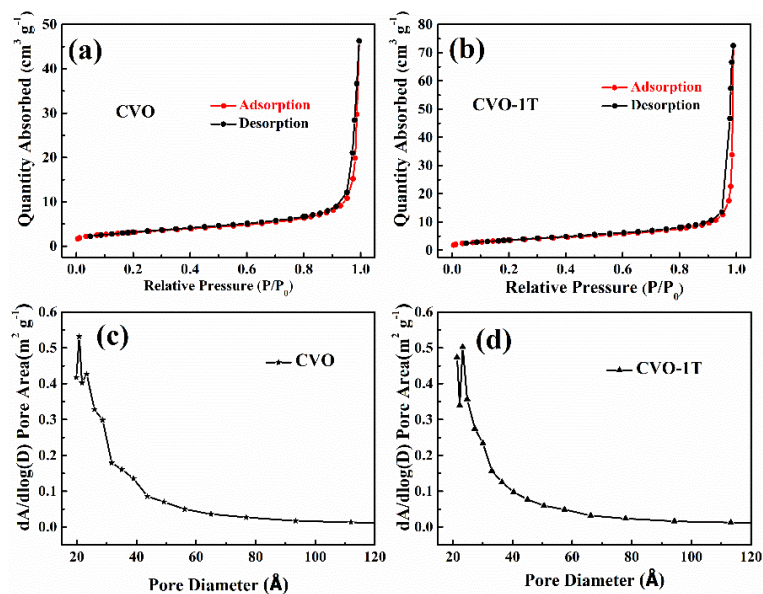

**Fig. S2**  $\text{N}_2$  adsorption-desorption isotherm of the (a) CVO and (b) CVO-1T samples. The distribution of pore size for (c) CVO and (d) CVO-1T samples.

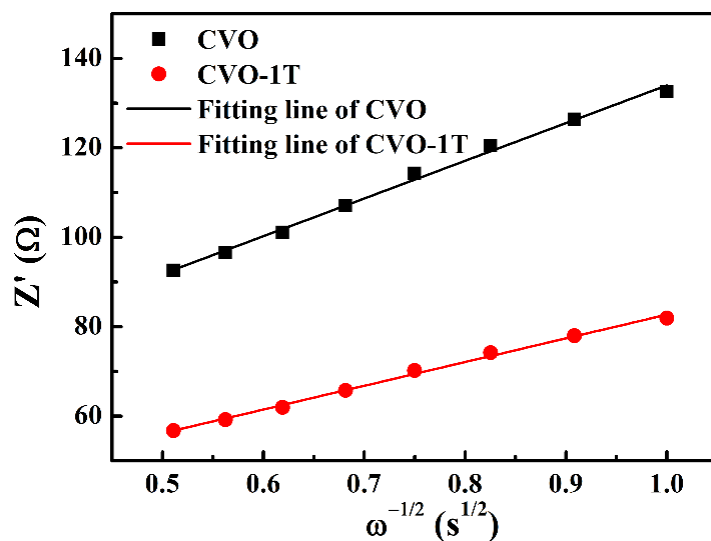

**Fig. S3** Linear fitting of  $Z' - \omega^{-1/2}$  relationship for the CVO and CVO-1T electrodes.

**Table S1.** The atomic ratios of the transition metal ions in the CVO and CVO-1T materials calculated from the XPS 2p<sub>3/2</sub> spectra.

| Sample | Co <sup>2+</sup> /Co <sup>3+</sup> | V <sup>4+</sup> /V <sup>5+</sup> |
|--------|------------------------------------|----------------------------------|
| CVO    | 1.635                              | 0.51                             |
| CVO-1T | 1.563                              | 0.56                             |
